# Supplementary material for: First-principles study of the lattice dynamics of Sb2S3
Source: Royal Society of Chemistry journal article supplement (doi:10.1039/c3cp53879f), 2013-11-20
Supplement: c3cp53879f.pdf [file c3cp53879f.pdf]

# First-principles study of the lattice dynamics of $\text{Sb}_2\text{S}_3$

Yun Liu,<sup>a</sup> Kun Ting Eddie Chua,<sup>b</sup> Tze Chien Sum,<sup>c,d,e</sup> and Chee Kwan Gan<sup>\*a</sup>

Received Xth XXXXXXXXXXXX 20XX, Accepted Xth XXXXXXXXXXXX 20XX

First published on the web Xth XXXXXXXXXXXX 200X

DOI: 10.1039/b000000x

## Supplementary Information

Fig. 1 shows the phonon dispersions of  $\text{Sb}_2\text{S}_3$  obtained with smaller  $1 \times 1 \times 1$  and  $1 \times 2 \times 1$  supercells. Degeneracies are lifted along high symmetry directions. Imaginary frequencies (represented by negative frequencies) are more pronounced in the  $1 \times 1 \times 1$  case.

Fig. 2 shows the phonon dispersions of  $\text{Bi}_2\text{S}_3$  obtained using  $1 \times 4 \times 1$ ,  $2 \times 2 \times 2$  and  $2 \times 4 \times 2$  supercells, as well as the vibrational density of states (vDOS). They exhibit similar features as that of  $\text{Sb}_2\text{S}_3$  [See Section 3.3 of the main text].

Table 1 shows all Raman active phonon modes of  $\text{Sb}_2\text{S}_3$ , calculated using the supercell force-constant method and DFPT.

**Table 1** All 30 Raman active phonon modes of  $\text{Sb}_2\text{S}_3$  obtained using the supercell force-constant method and DFPT.

| Raman mode      | Intensity $\text{\AA}^4 \text{u}^{-1}$ | DFPT $(\text{cm}^{-1})$ | Supercell $(\text{cm}^{-1})$ |
|-----------------|----------------------------------------|-------------------------|------------------------------|
| $\text{B}_{2g}$ | 0.01                                   | 47.1                    | 46.8                         |
| $\text{B}_{1g}$ | 267                                    | 47.7                    | 47.7                         |
| $\text{B}_{3g}$ | 1320                                   | 50.8                    | 50.8                         |
| $\text{A}_g$    | 475                                    | 54.3                    | 54.2                         |
| $\text{B}_{1g}$ | 2.0                                    | 68.8                    | 68.8                         |
| $\text{B}_{3g}$ | 1140                                   | 69.1                    | 69.0                         |
| $\text{A}_g$    | 1160                                   | 74.5                    | 74.2                         |
| $\text{B}_{2g}$ | 573                                    | 99.1                    | 99.1                         |
| $\text{A}_g$    | 187                                    | 100.0                   | 100.0                        |
| $\text{B}_{2g}$ | 228                                    | 112.4                   | 112.1                        |
| $\text{B}_{2g}$ | 9.3                                    | 124.1                   | 125.0                        |
| $\text{A}_g$    | 1190                                   | 131.7                   | 131.5                        |
| $\text{A}_g$    | 2680                                   | 169.6                   | 169.5                        |
| $\text{B}_{2g}$ | 751                                    | 171.2                   | 171.0                        |
| $\text{B}_{1g}$ | 3280                                   | 186.6                   | 186.6                        |
| $\text{A}_g$    | 9970                                   | 196.7                   | 197.4                        |
| $\text{B}_{3g}$ | 2780                                   | 198.1                   | 198.1                        |
| $\text{B}_{2g}$ | 130                                    | 199.7                   | 199.5                        |
| $\text{B}_{3g}$ | 16000                                  | 200.8                   | 200.8                        |
| $\text{B}_{1g}$ | 1590                                   | 208.2                   | 208.2                        |
| $\text{B}_{1g}$ | 8990                                   | 229.3                   | 229.3                        |
| $\text{B}_{3g}$ | 1390                                   | 231.4                   | 231.4                        |
| $\text{A}_g$    | 4500                                   | 251.0                   | 251.0                        |
| $\text{B}_{2g}$ | 240                                    | 254.2                   | 254.6                        |
| $\text{A}_g$    | 56500                                  | 261.7                   | 261.6                        |
| $\text{B}_{2g}$ | 94.0                                   | 277.7                   | 278.0                        |
| $\text{A}_g$    | 19100                                  | 277.9                   | 278.0                        |
| $\text{B}_{2g}$ | 1980                                   | 286.6                   | 285.9                        |
| $\text{A}_g$    | 4950                                   | 290.8                   | 290.7                        |
| $\text{B}_{2g}$ | 5090                                   | 294.3                   | 295.9                        |

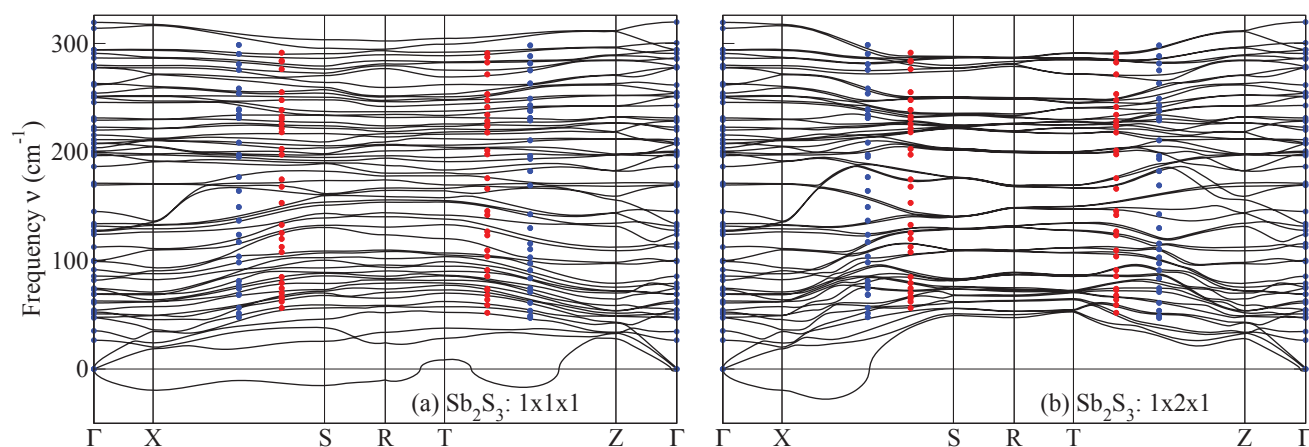

**Fig. 1** (Color online) First-principles phonon dispersions along high symmetry directions for orthorhombic  $\text{Sb}_2\text{S}_3$  calculated using the supercell force-constant method for  $1 \times 1 \times 1$  and  $1 \times 2 \times 1$  supercells. The selected  $\mathbf{q}$ -points are  $\Gamma = (0, 0, 0)$ ,  $X = (\frac{1}{2}, 0, 0)$ ,  $S = (\frac{1}{2}, \frac{1}{2}, 0)$ ,  $R = (\frac{1}{2}, \frac{1}{2}, \frac{1}{2})$ ,  $T = (0, \frac{1}{2}, \frac{1}{2})$ , and  $Z = (0, 0, \frac{1}{2})$ . Blue circles are phonon frequencies calculated from DFPT at  $\mathbf{q}$ -points commensurate with  $2 \times 4 \times 2$  supercell, while red circles are frequencies at  $\mathbf{q}$ -points non-commensurate with any of the supercells.

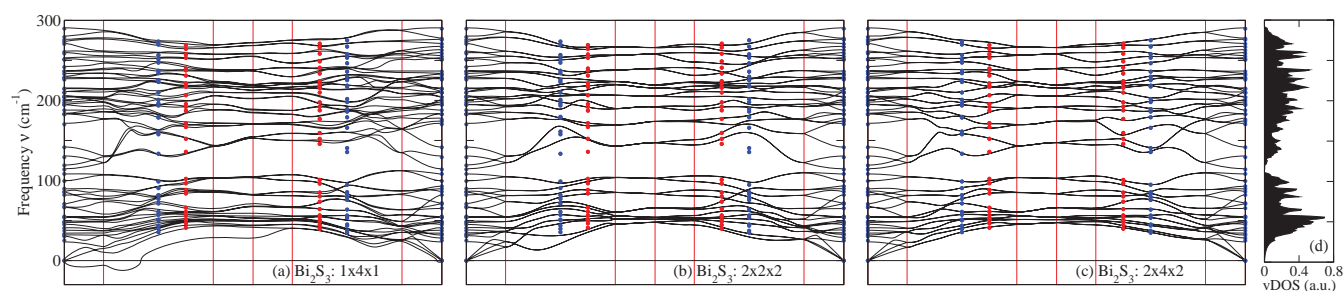

**Fig. 2** (Color online) First-principles phonon dispersions along high symmetry directions for orthorhombic  $\text{Bi}_2\text{S}_3$  calculated using the supercell force-constant method for  $1 \times 4 \times 1$ ,  $2 \times 2 \times 2$  and  $2 \times 4 \times 2$  supercells. The selected  $\mathbf{q}$ -points are  $\Gamma = (0, 0, 0)$ ,  $X = (\frac{1}{2}, 0, 0)$ ,  $S = (\frac{1}{2}, \frac{1}{2}, 0)$ ,  $R = (\frac{1}{2}, \frac{1}{2}, \frac{1}{2})$ ,  $T = (0, \frac{1}{2}, \frac{1}{2})$ , and  $Z = (0, 0, \frac{1}{2})$ . Blue circles are phonon frequencies calculated from DFPT at  $\mathbf{q}$ -points commensurate with  $2 \times 4 \times 2$  supercell, while red circles are frequencies at  $\mathbf{q}$ -points non-commensurate with any of the supercells. Imaginary frequencies (represented by negative frequencies) are present in  $1 \times 4 \times 1$  supercell. Degeneracies are preserved in the  $2 \times 2 \times 2$  and  $2 \times 4 \times 2$  supercells but lost in  $1 \times 4 \times 1$  supercell.
